# Supplementary material
Source: publisher site journal article supplement (https://www.spandidos-publications.com/7924/downloadSupplementary)
Supplement: Supplementary file 1 [file downloadSupplementary]

**Table SIII.** Clinical characteristics of The Cancer Genome Atlas-lung adenocarcinoma cohort.

| Characteristic                  | Total (n=515) | Training (n=360) | Test (n=155) | P-value |
|---------------------------------|---------------|------------------|--------------|---------|
| Age, years; median (IQR)        | 65 (57-72)    | 64 (57-71)       | 66 (58-73)   | 0.15    |
| Sex, n (%)                      |               |                  |              | 0.87    |
| Male                            | 243 (47.2)    | 171 (47.5)       | 72 (46.5)    |         |
| Female                          | 272 (52.8)    | 189 (52.5)       | 83 (53.5)    |         |
| AJCC Stage, n (%)               |               |                  |              | 0.92    |
| I                               | 268 (52.0)    | 188 (52.2)       | 80 (51.6)    |         |
| II                              | 122 (23.7)    | 85 (23.6)        | 37 (23.9)    |         |
| III                             | 86 (16.7)     | 60 (16.7)        | 26 (16.8)    |         |
| IV                              | 39 (7.6)      | 27 (7.5)         | 12 (7.7)     |         |
| T Stage, n (%)                  |               |                  |              | 0.68    |
| T1                              | 173 (33.6)    | 123 (34.2)       | 50 (32.3)    |         |
| T2                              | 272 (52.8)    | 187 (51.9)       | 85 (54.8)    |         |
| T3                              | 49 (9.5)      | 36 (10.0)        | 13 (8.4)     |         |
| T4                              | 21 (4.1)      | 14 (3.9)         | 7 (4.5)      |         |
| Treatment, n (%)                |               |                  |              |         |
| Surgery only                    | 184 (35.7)    | 130 (36.1)       | 54 (34.8)    | 0.79    |
| Surgery + chemotherapy          | 302 (58.6)    | 210 (58.3)       | 92 (59.4)    |         |
| Radiation                       | 108 (21.0)    | 76 (21.1)        | 32 (20.6)    | 0.91    |
| Targeted therapy                | 64 (12.4)     | 44 (12.2)        | 20 (12.9)    | 0.83    |
| Immunotherapy                   | 15 (2.9)      | 11 (3.1)         | 4 (2.6)      | 0.76    |
| Survival status, n (%)          |               |                  |              | 0.94    |
| Alive                           | 319 (61.9)    | 223 (61.9)       | 96 (61.9)    |         |
| Dead                            | 196 (38.1)    | 137 (38.1)       | 59 (38.1)    |         |
| Follow-up, months; median (IQR) | 32.6 (15-54)  | 33.1 (15-55)     | 31.8 (14-52) | 0.41    |

Wilcoxon test; Chi-square test. IQR, interquartile range.
